# Supplementary material for: Identification of cuproptosis-related gene SLC31A1 and upstream LncRNA-miRNA regulatory axis in breast cancer
Source: Springer Nature journal article supplement (doi:10.1038/s41598-023-45761-5), 2023-10-26
Supplement: MOESM1 [file 41598_2023_45761_MOESM1_ESM.pdf]

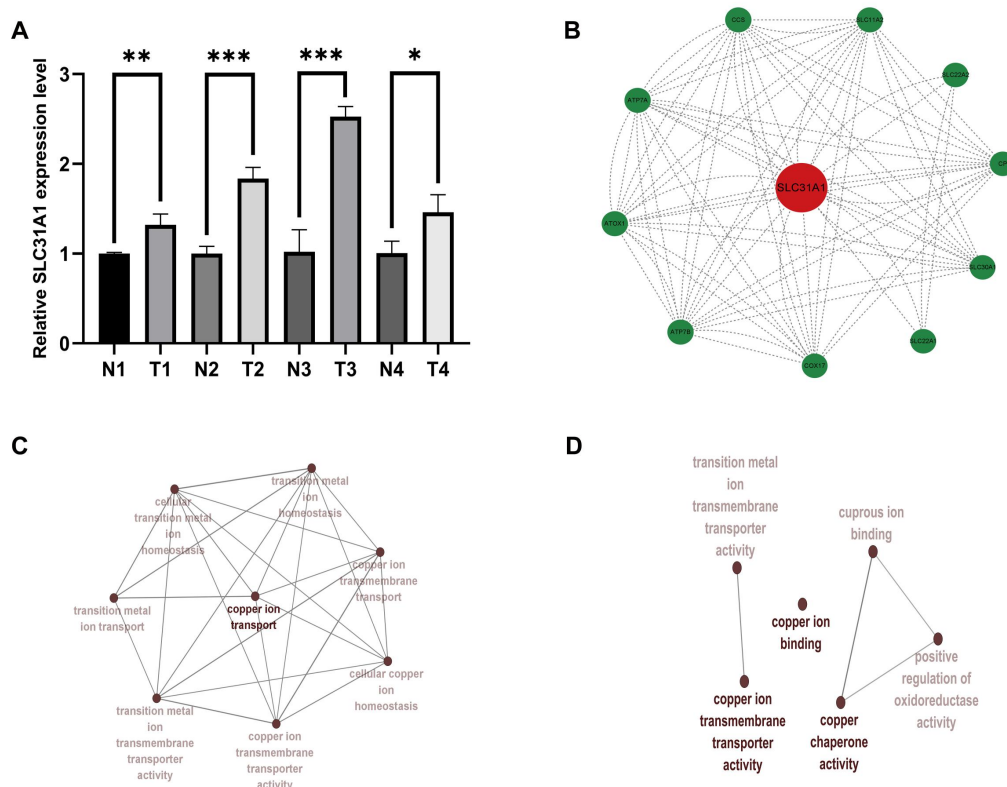

**Supplementary Figure 1. Expression, PPI network, and enrichment analysis of SLC31A1 in breast cancer.** (A) Expression level of SLC31A1 in 4 pairs of breast cancer samples and adjacent normal breast tissues obtained from own hospital. \*  $P < 0.05$ , \*\* $P < 0.01$ , \*\*\*  $P < 0.001$ . (B) Analysis of PPI network. (C) Enrichment analysis of biological process of SLC31A1-interacting proteins. (D) Enrichment analysis of molecular function of SLC31A1-interacting proteins.
